# Supplementary material for: Increased Circulating Levels of Vitamin D Binding Protein in MS Patients
Source: MDPI journal article supplement (doi:10.3390/toxins7010129), 2015-01-13
Supplement: s1 [file s1]

## Supplementary Information

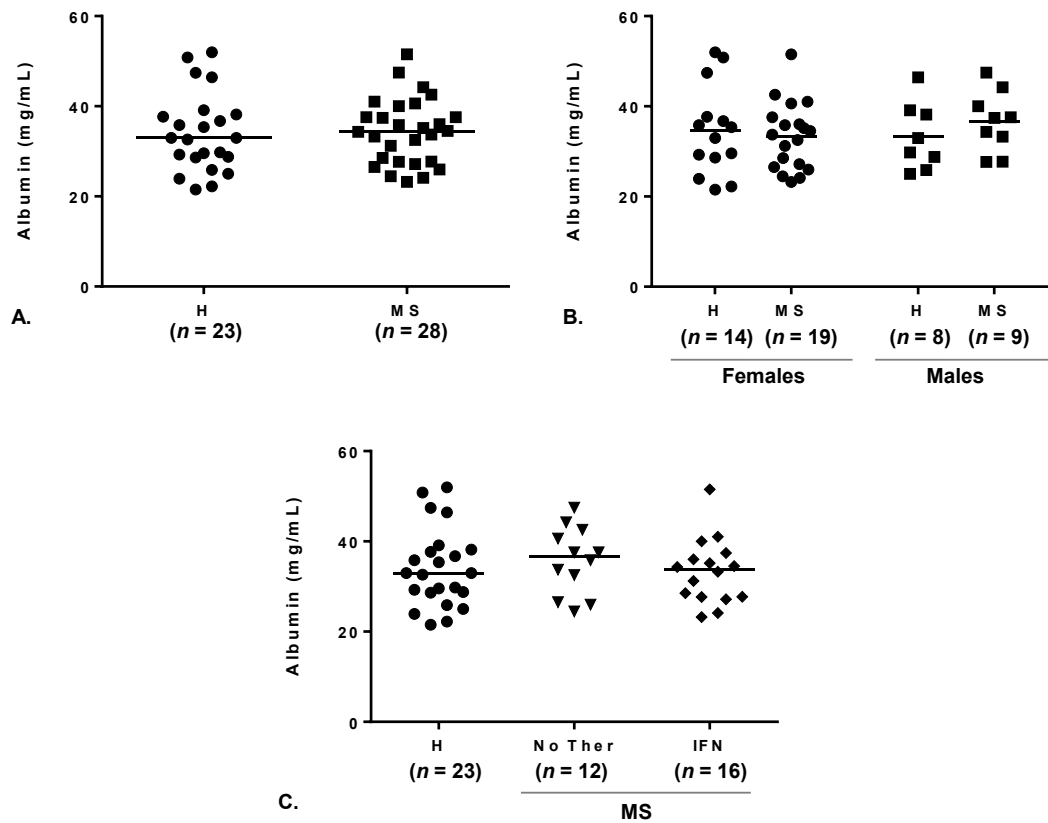

**Figure S1.** Plasma albumin concentration. Dot plots of plasma albumin concentration in MS patients and healthy controls. Horizontal lines indicate median values. (A) Comparison of healthy controls with MS patients; (B) Subject stratification by gender; (C) Patient stratification by therapy. H, healthy controls; MS, patients; IFN, patients undergoing IFN $\beta$  therapy; No Ther, patients not undergoing any therapy.
